# Supplementary material for: Distribution of Biodiversity of Wild Beet Species (Genus Beta L.) in Armenia under Ongoing Climate Change Conditions
Source: MDPI journal article supplement (doi:10.3390/plants11192502), 2022-09-24
Supplement: s1 [file s1]

**A**

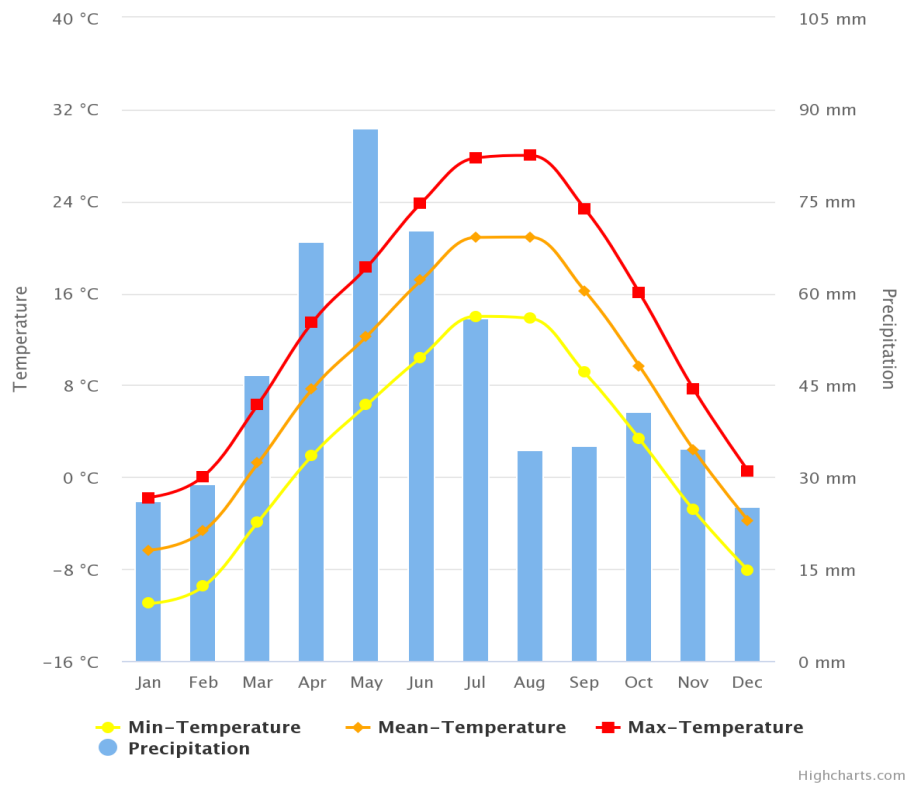

**B**

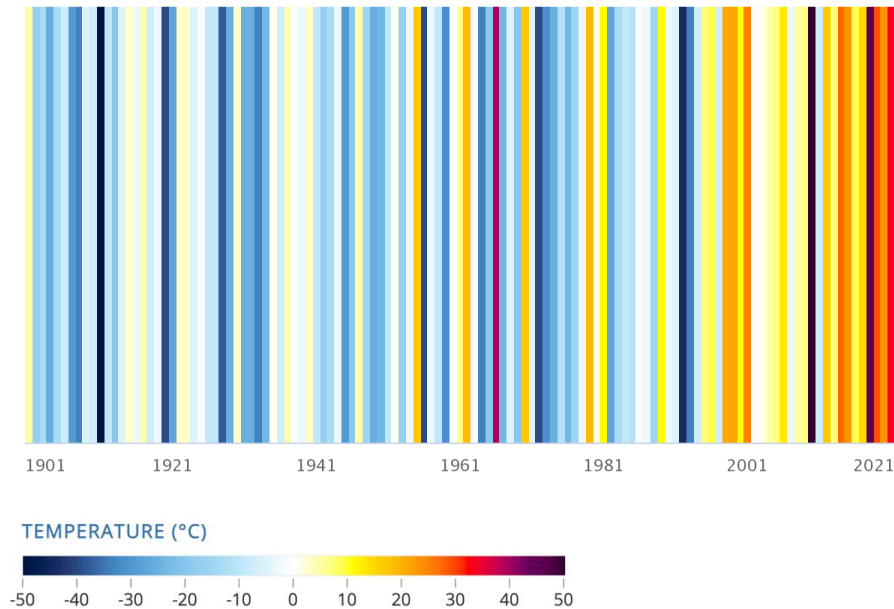

**Figure S2.** Climate in Armenia. Monthly climatology of min-temperature, mean temperature, max-temperature and precipitation in 1991-2020 in Armenia **(A)**. Observed annual mean-temperatures, 1901-2020 in Armenia **(B)**. Obtained from WBG Climate Change Knowledge Portal (CCKP, 2020). Climate Data: Historical. URL: <https://climateknowledgeportal.worldbank.org/country/armenia/climate-data-historical>
