# Supplementary material for: Distribution of Biodiversity of Wild Beet Species (Genus Beta L.) in Armenia under Ongoing Climate Change Conditions
Source: MDPI journal article supplement (doi:10.3390/plants11192502), 2022-09-24
Supplement: s1 [file s1]

A. Distribution of *Beta lomatogona* Fisch. & C.A.Mey.

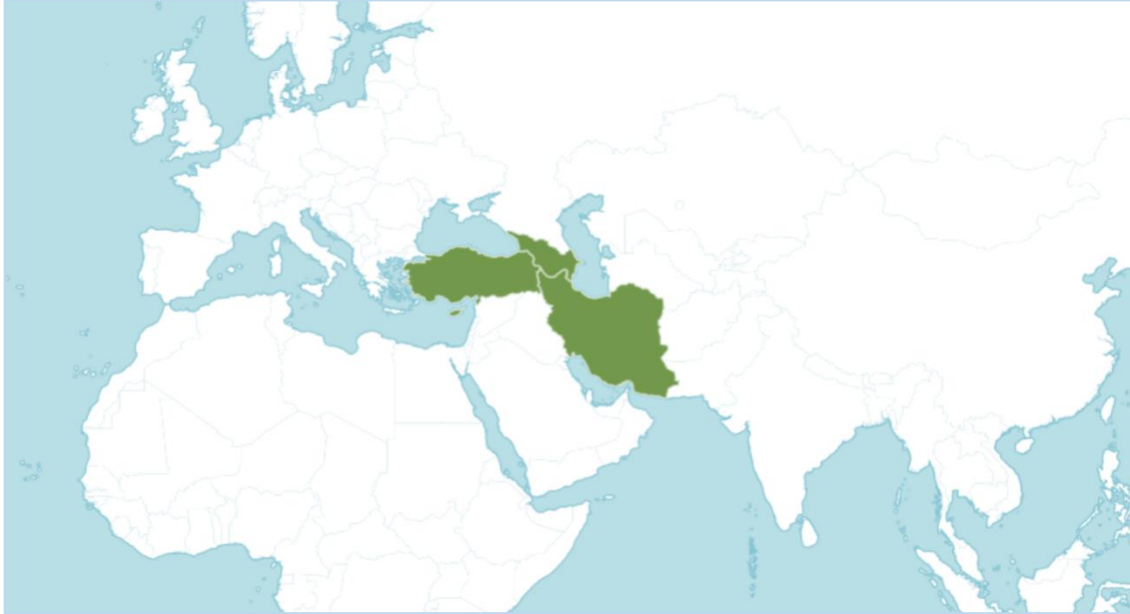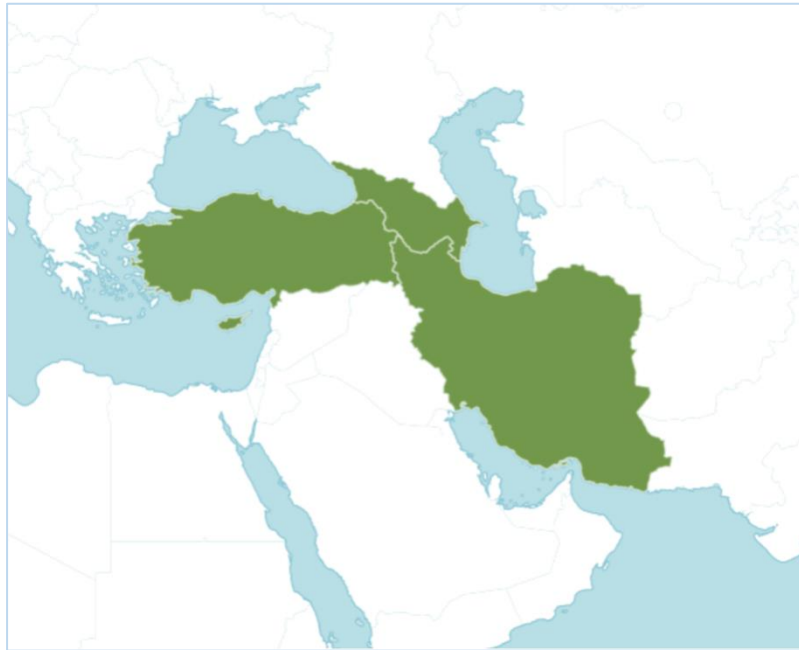

■ Native

**Native to:**

Cyprus, Iran, Transcaucasus, Turkey

**Reference:**

POWO (2022). "Plants of the World Online. Facilitated by the Royal Botanic Gardens, Kew. Published on the Internet; <http://www.plantsoftheworldonline.org/>  
Retrieved 25 August 2022."

## B. Distribution of *Beta corolliflora* Zosimovic ex Buttler

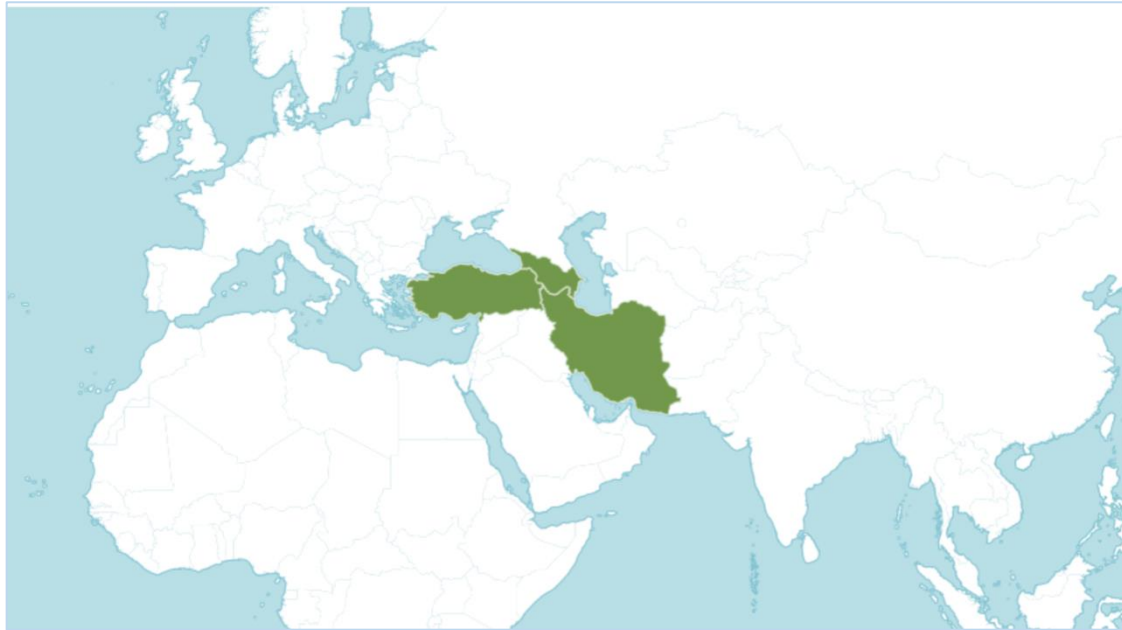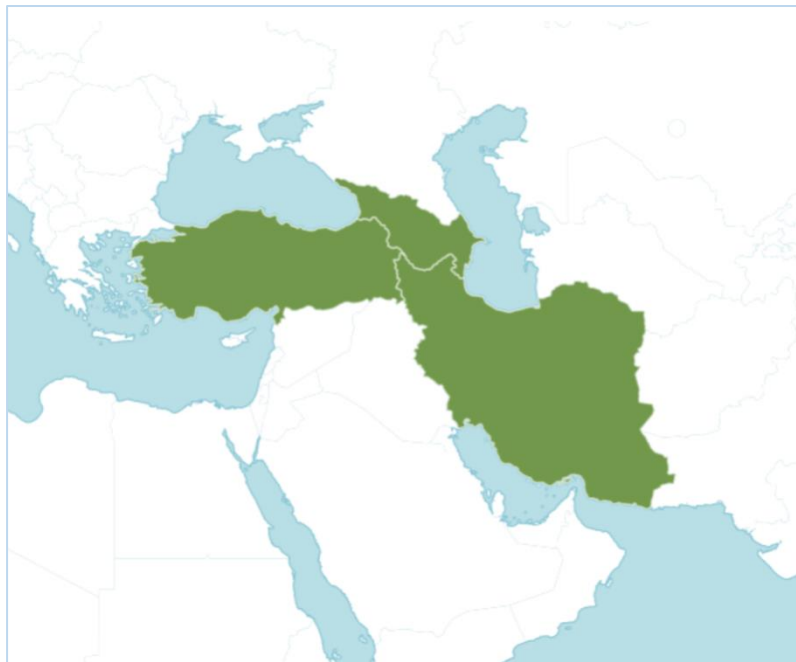

■ Native

### Native to:

Iran, Transcaucasus, Turkey

### Reference:

POWO (2022). "Plants of the World Online. Facilitated by the Royal Botanic Gardens, Kew. Published on the Internet; <http://www.plantsoftheworldonline.org/>  
Retrieved 25 August 2022.

### C. Distribution of *Beta macrorhiza* Steven

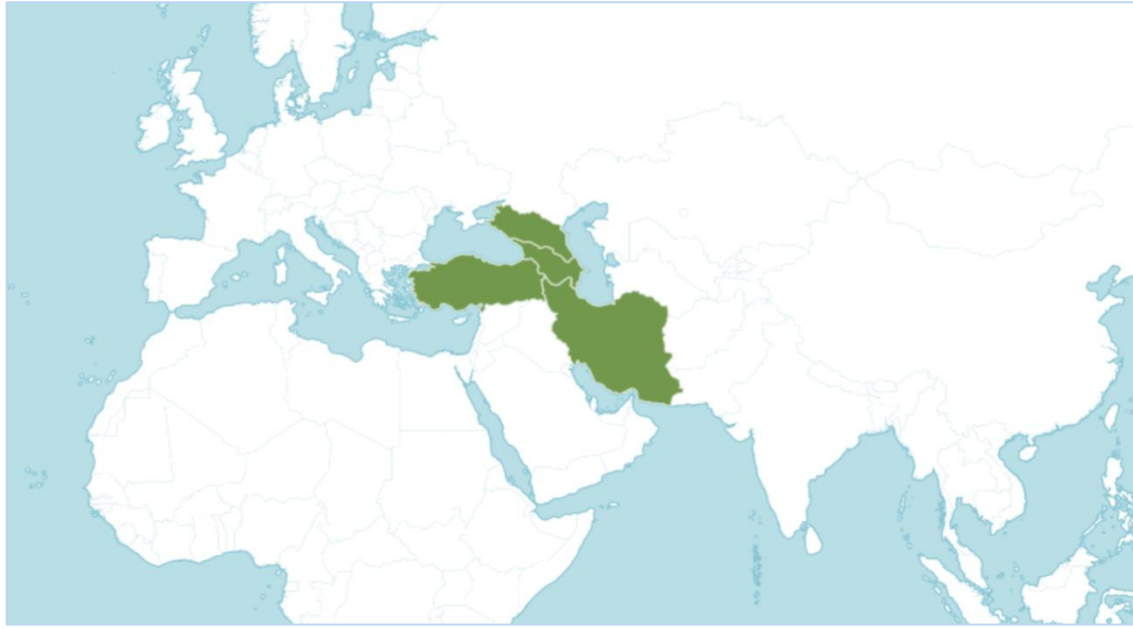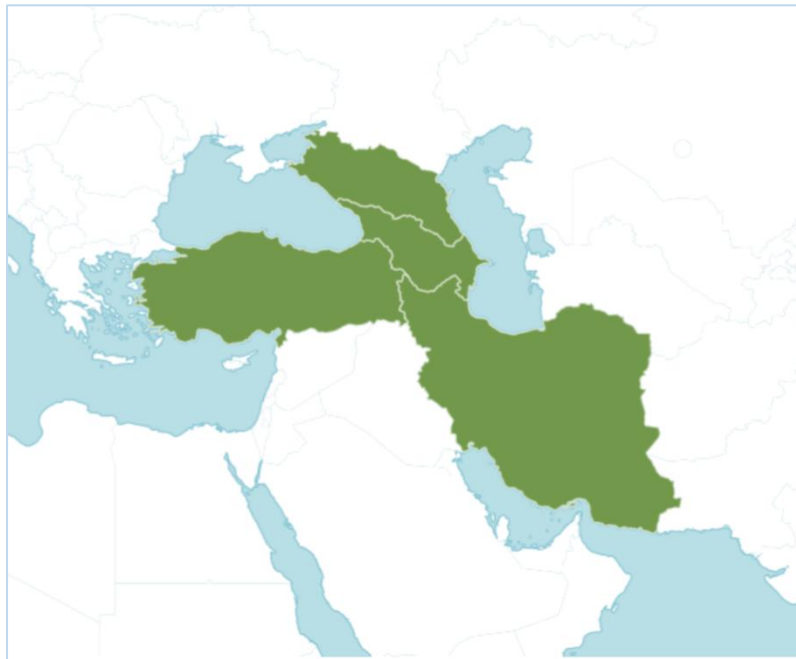

■ Native

#### Native to:

Iran, North Caucasus, Transcaucasia, Turkey

#### Reference:

POWO (2022). "Plants of the World Online. Facilitated by the Royal Botanic Gardens, Kew. Published on the Internet; <http://www.plantsoftheworldonline.org/> Retrieved 25 August 2022.

**Figure S3:** Distribution range of *B. lomatogona*, *B. corolliflora* and *B. macrorhiza*.
