# Supplementary material for: Distribution of Biodiversity of Wild Beet Species (Genus Beta L.) in Armenia under Ongoing Climate Change Conditions
Source: MDPI journal article supplement (doi:10.3390/plants11192502), 2022-09-24
Supplement: s1 [file s1]

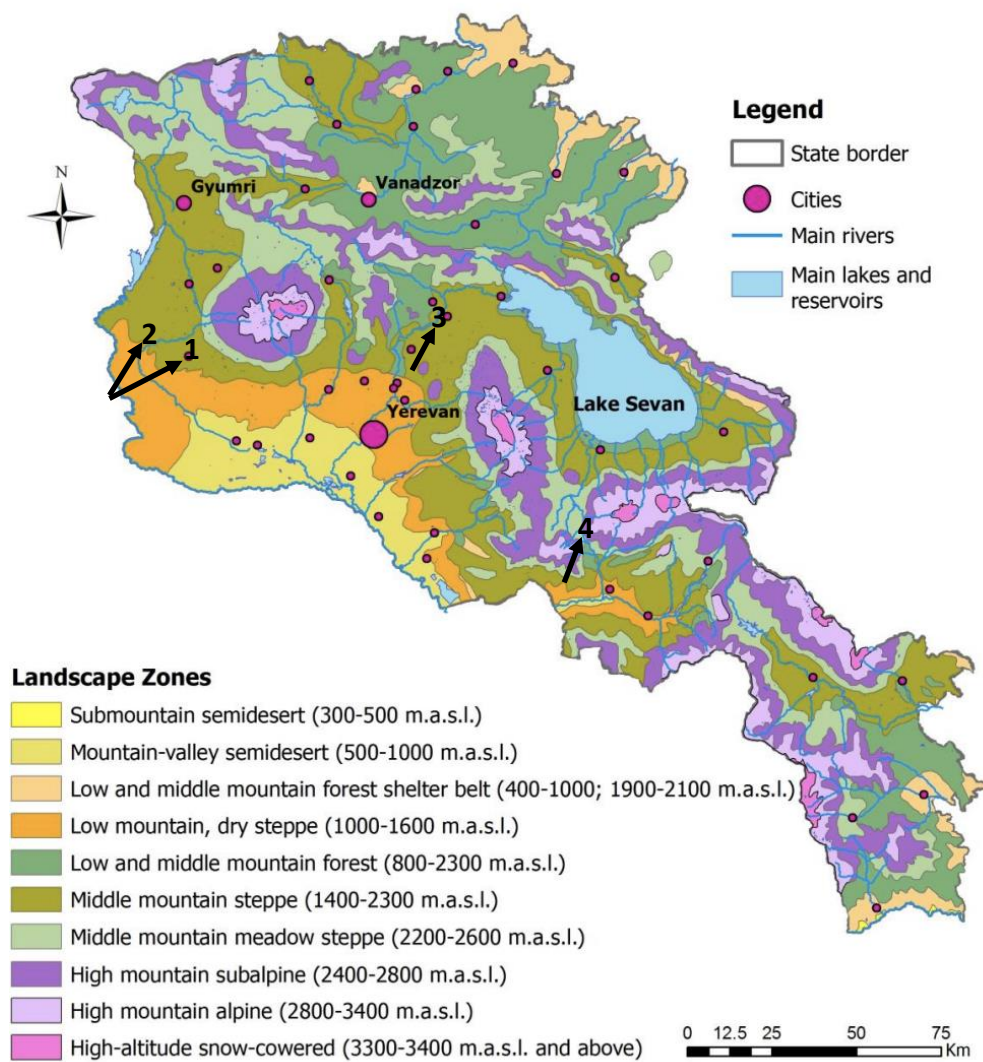

| Plot | Location        | Altitude<br>m a.s.l | Landscape zone                | Species                |
|------|-----------------|---------------------|-------------------------------|------------------------|
| 1    | Akunq           | 1700                | Middle mountain steppe        | <i>B. lomatogona</i>   |
| 2    | Zarindja        | 1660                |                               |                        |
| 3    | Hrazdan         | 1665                | Middle mountain steppe        | <i>B. corolliflora</i> |
| 4    | Vardenyats Pass | 2410                | Middle mountain meadow steppe | <i>B. macrorhiza</i>   |

**Figure S1.** Landscape zones of the Republic of Armenia. Selected locations of *B. lomatogona*, *B. corolliflora* and *B. macrorhiza*. Adapted from Fifth National Report of the Republic of Armenia to the Convention on Biological Diversity; Yerevan, Armenia, 2014; 107 p. URL: <https://www.cbd.int/doc/world/am/am-nr-05-en.pdf>
